# Supplementary material for: Geodesigning A Game-Theory-Based Compromise Solution Approach in Determining the Cultivation Pattern
Source: Research Square preprint supplement (doi:10.21203/rs.3.rs-2543128/v1), 2023-02-06
Supplement: Supplementary file 1 [file b91ca5ea7f91fbc510ee1868.docx]

Table 1: Payoff scenarios proposed by MODM in GAMS environment


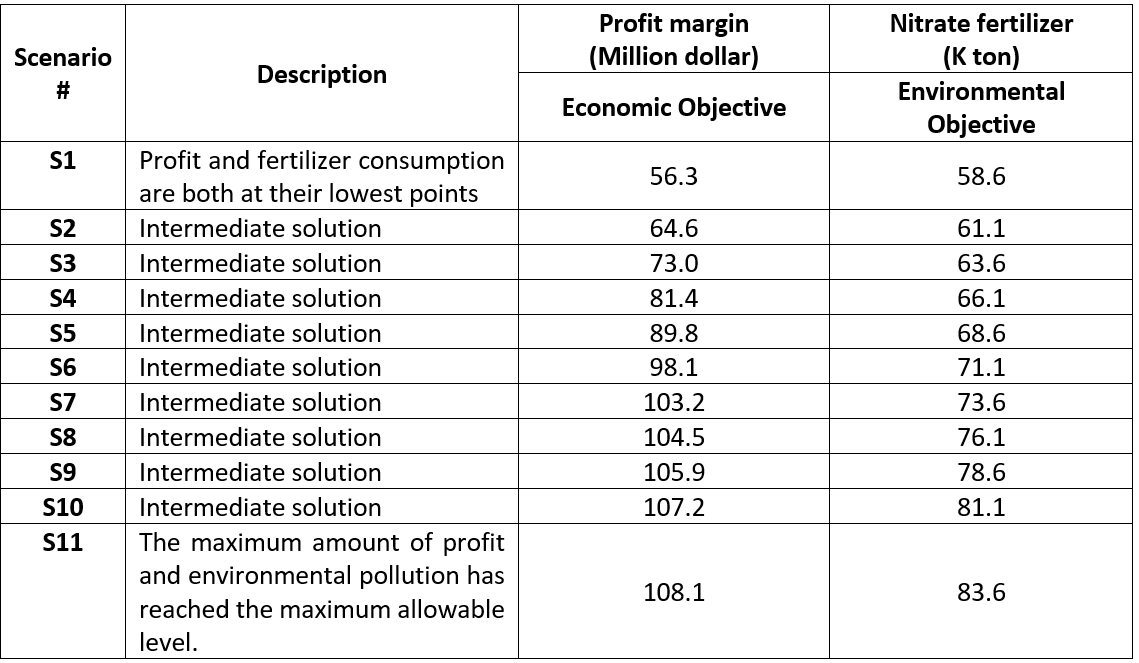


Table 2: Summary of bargaining solutions

Table 3: Comparison of the areas under cultivation of dominant crops in 8 regions (hectares)

Table 4: The outcome in 2020
